# Supplementary material
Source: publisher figshare collection journal article supplement (https://acs.figshare.com/ndownloader/files/3826555)
Supplement: Supplementary file 1 [file 3826555]

# Influence of Antifreeze Proteins on the Ice/Water Interface

Guido Todde,<sup>†</sup> Sven Hovmöller,<sup>†</sup> and Aatto Laaksonen<sup>\*†‡¶</sup>

<sup>†</sup>*Department of Material and Environmental Chemistry, Arrhenius Laboratory, Stockholm University, 10691 Stockholm, Sweden,*

<sup>‡</sup>*Science for Life Laboratory, 17121 Solna, Sweden , and*

<sup>¶</sup>*Stellenbosch Institute of Advanced Study (STIAS), Wallenberg Research Centre at Stellenbosch University, 7600 Stellenbosch, South Africa*

\*e-mail: [aatto@mmk.su.se](mailto:aatto@mmk.su.se)

## Supporting Information Available

The Supporting Information contain the diffusion profiles of all ice/water (S1), sfAFP/ice/water (S2), wfAFP/ice/water systems (S3) and ubiquitin/ice/water (S4); a plot of the center of mass movement of sfAFP (S5), wfAFP (S6) and ubiquitin (S7) with respect to the axis perpendicular to the ice/water interface.

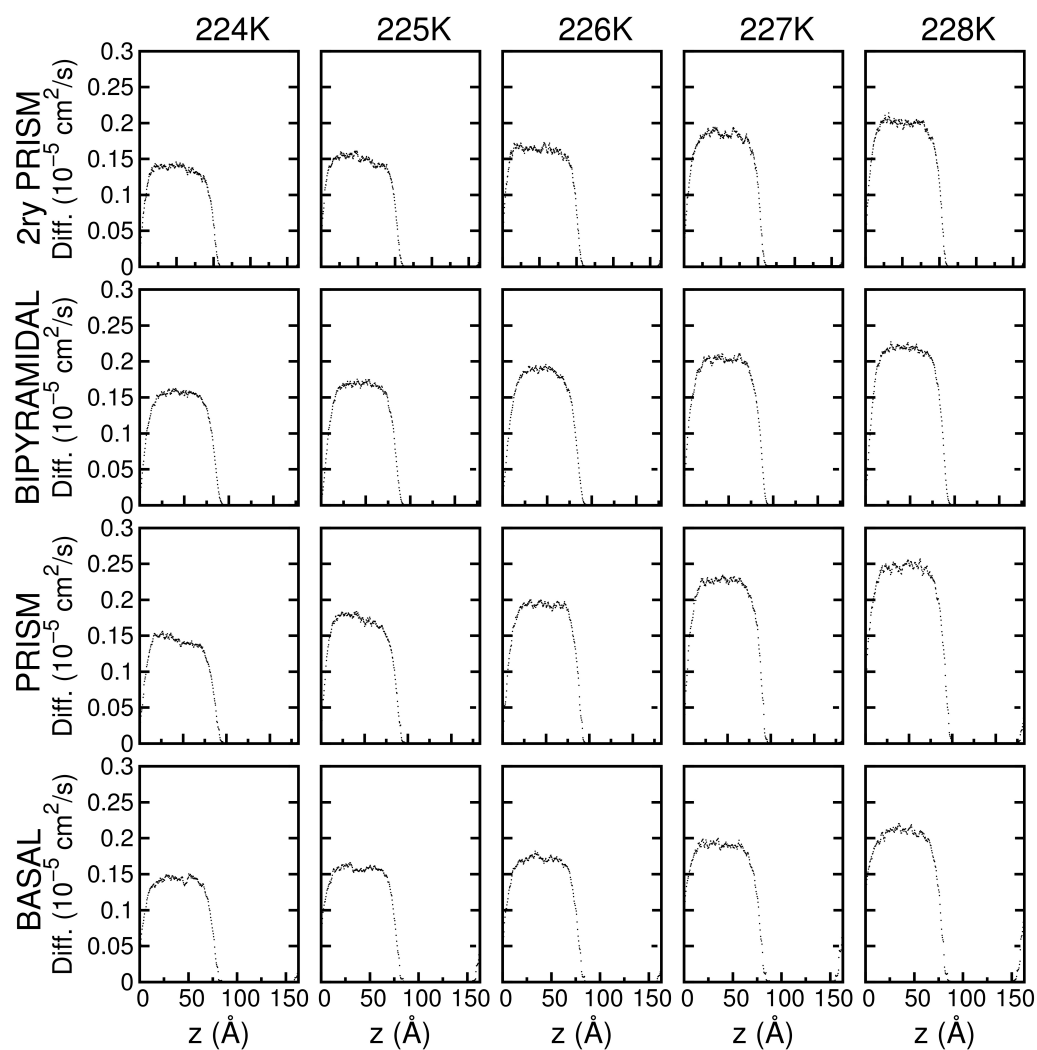

Figure S1: Diffusion profile of the ice/water systems at different temperatures for the different ice planes.

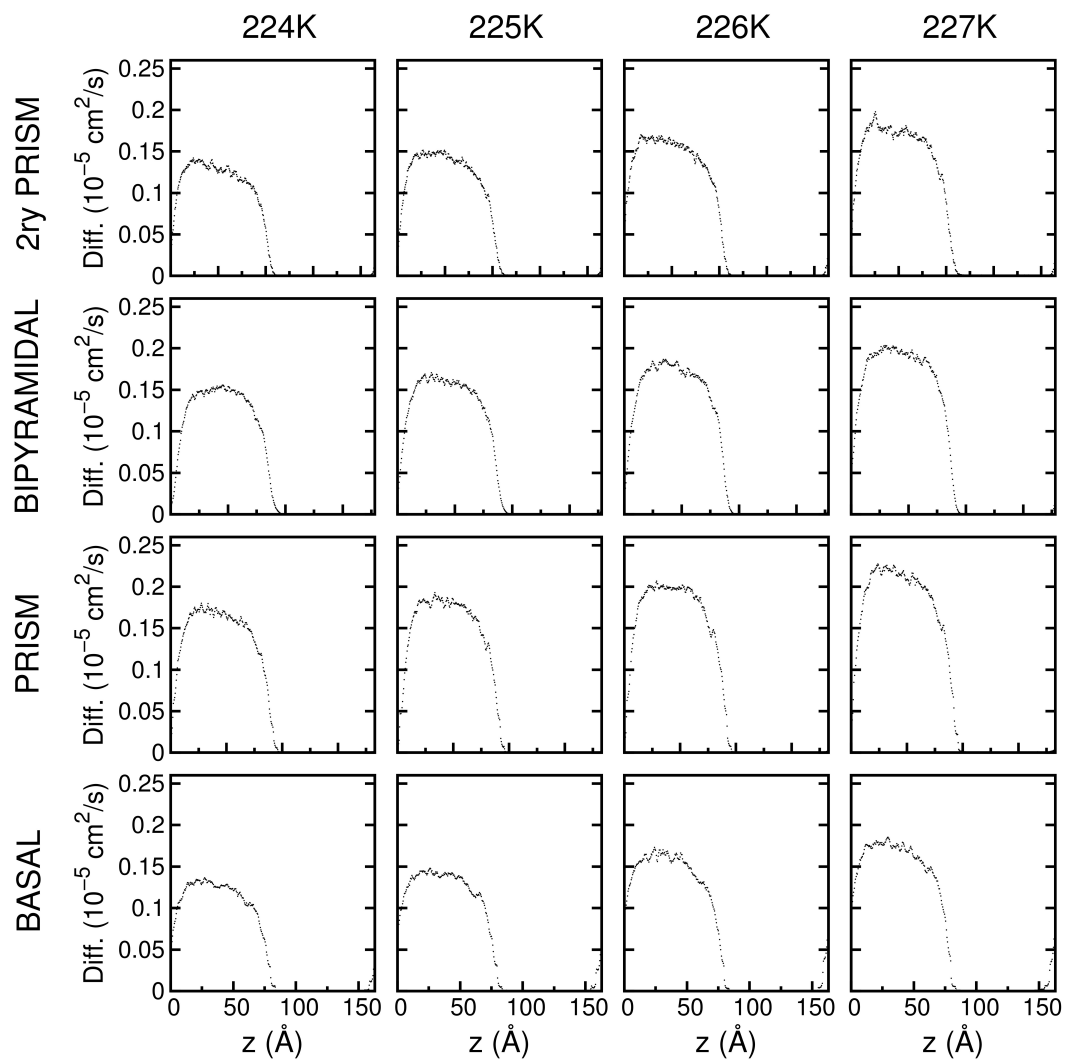

Figure S2: Diffusion profile of the ice/water systems at different temperatures with the sfAFP attached onto the different ice planes.

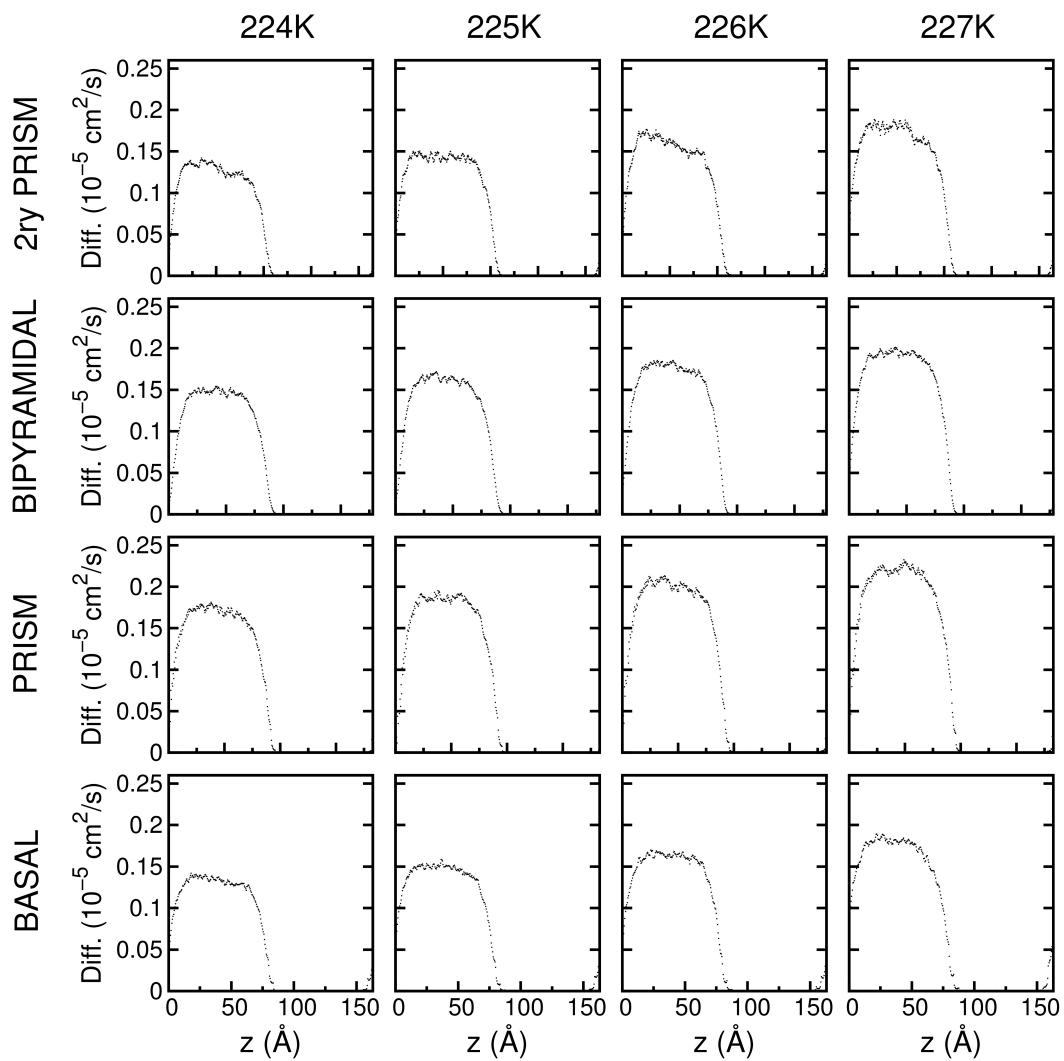

Figure S3: Diffusion profile of the ice/water systems at different temperatures with the wfAFP attached onto the different ice planes.

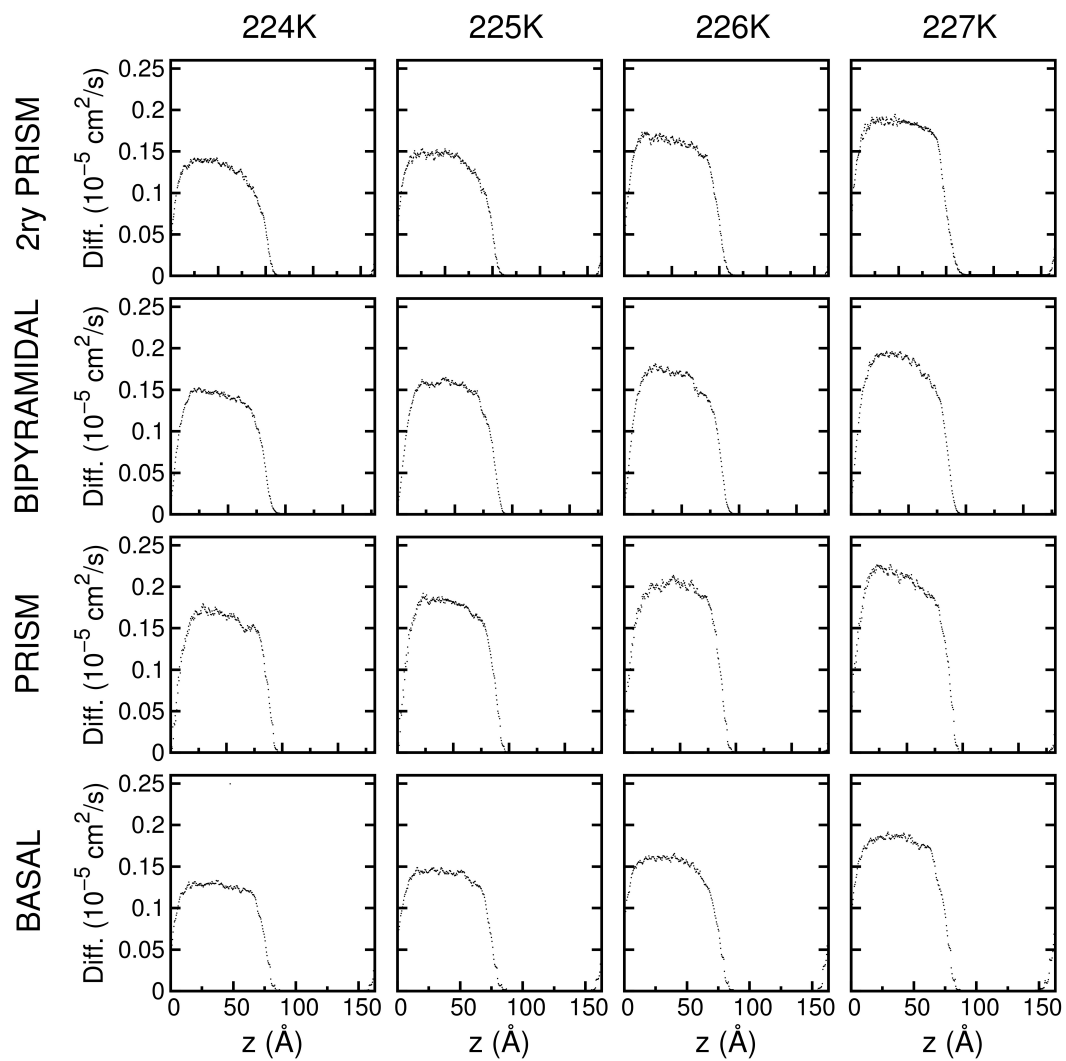

Figure S4: Diffusion profile of the ice/water systems at different temperatures with the ubiquitin attached onto the different ice planes.

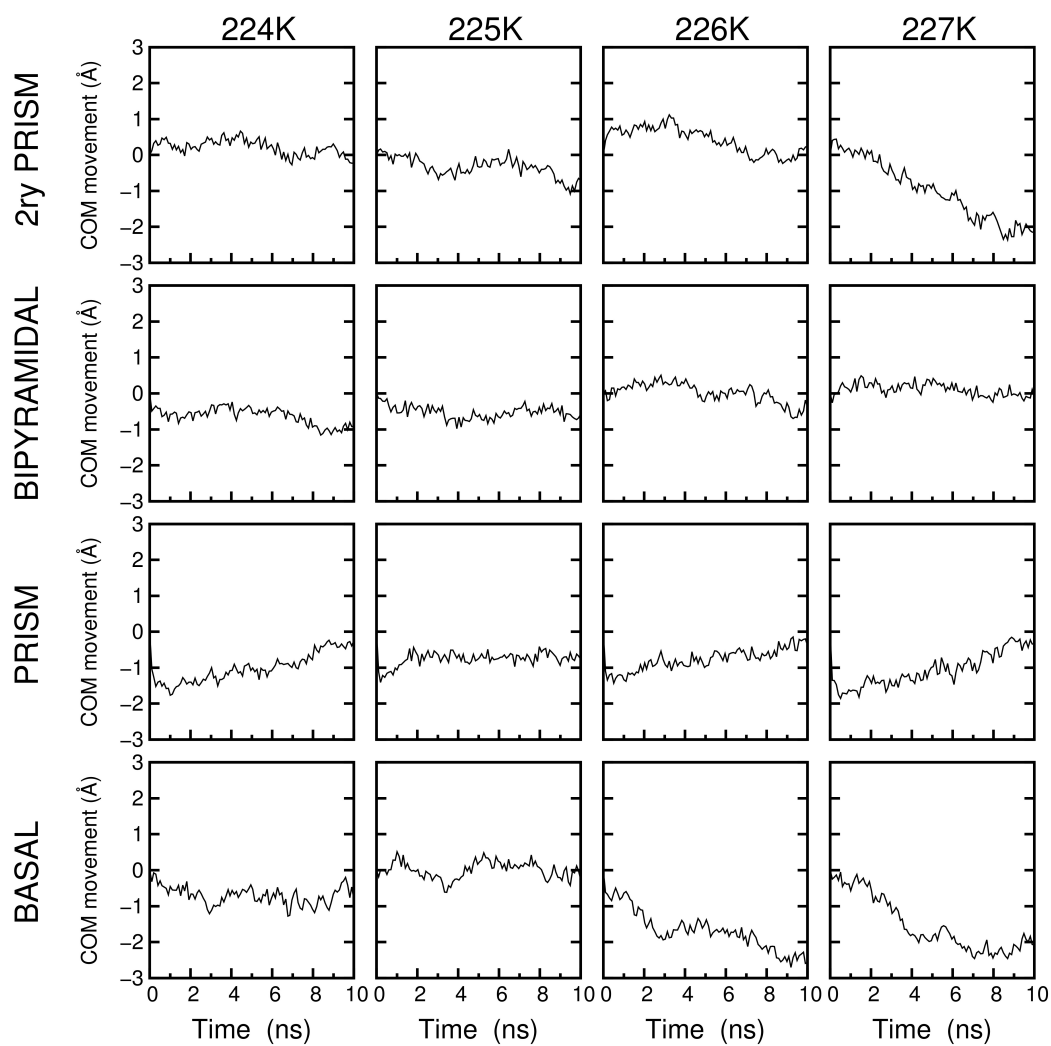

Figure S5: Center of mass movements with respect to axis perpendicular to the ice/water interface of the sfAFP/ice/water systems.

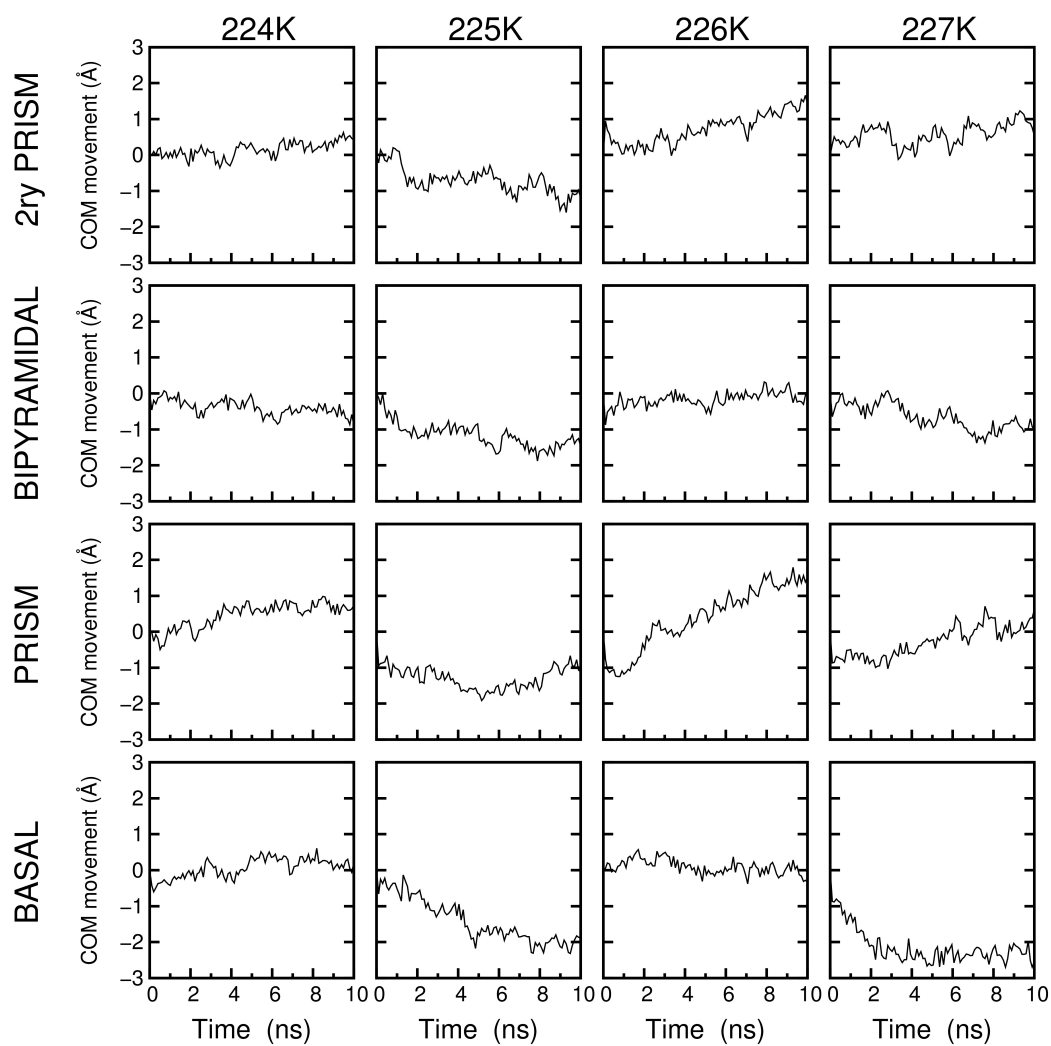

Figure S6: Center of mass movements with respect to axis perpendicular to the ice/water interface of the wfAFP/ice/water systems.



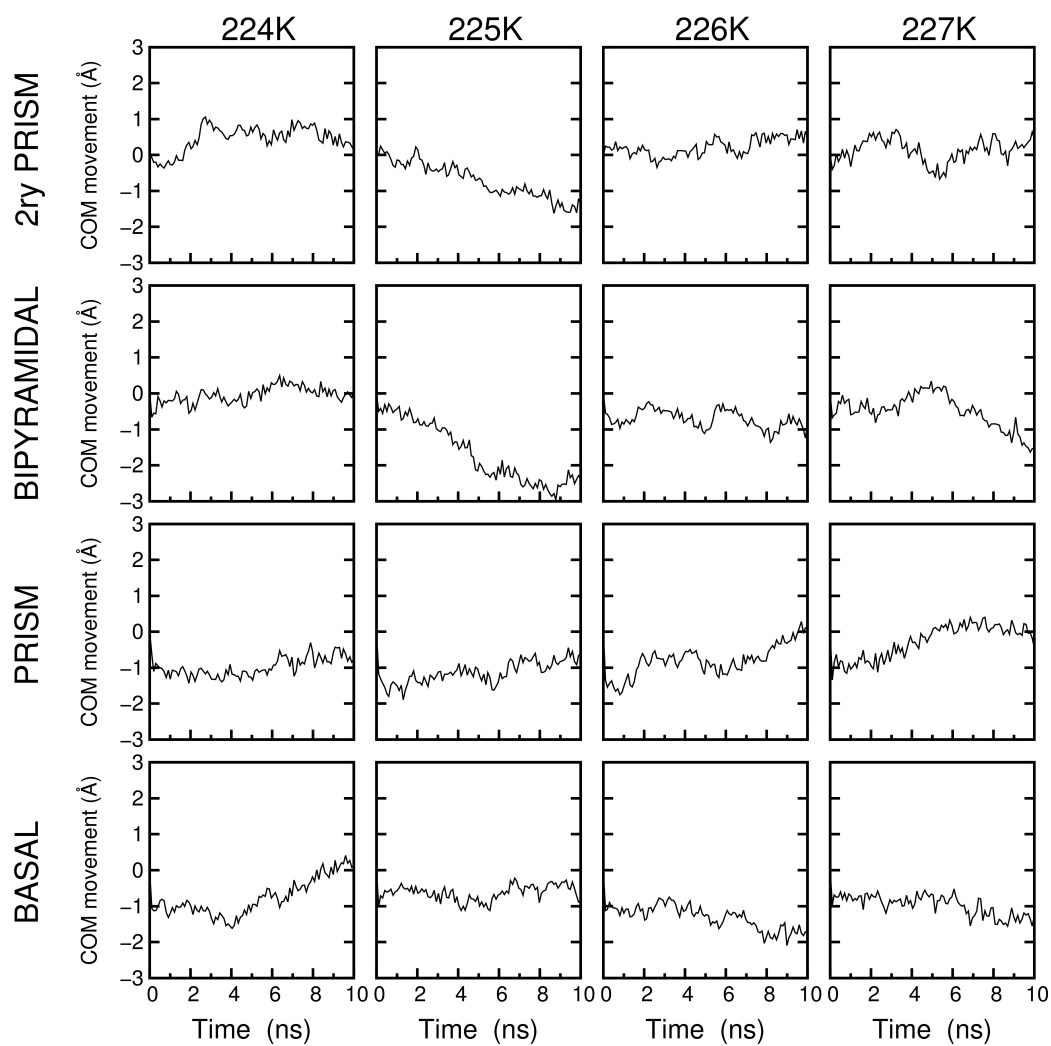

Figure S7: Center of mass movements with respect to axis perpendicular to the ice/water interface of the ubiquitin/ice/water systems.
